# Supplementary material for: Neoantigens as potential vaccines in hepatocellular carcinoma
Source: PubMed Central journal article supplement — J Immunother Cancer. 2022 Feb 22;10(2):e003978. doi: 10.1136/jitc-2021-003978 (PMC9066373; doi:10.1136/jitc-2021-003978), 2022-02-22
Supplement: jitc-2021-003978supp003.pdf [file jitc-2021-003978supp003.pdf]

**Supplementary methods for Supplementary Figure S1:***CIBERSORT analysis*

Characterization of immune cell types in T and NT samples was carried out using CIBERSORT (<https://cibersort.stanford.edu>) [1]. By applying the original CIBERSORT gene signature file LM22, the percentage of 22 immune cell subtypes was calculated in the sample dataset. Data were analyzed with a number of permutations set to 100. Immune cell profile was calculated for each sample and T test was used to compare between T and NT samples.

[1] Newman AM, Liu CL, Green MR, Gentles AJ, Feng W, Xu Y, et al. Robust enumeration of cell subsets from tissue expression profiles. *Nat Methods* 2015;12:453–7. <https://doi.org/10.1038/nmeth.3337>.

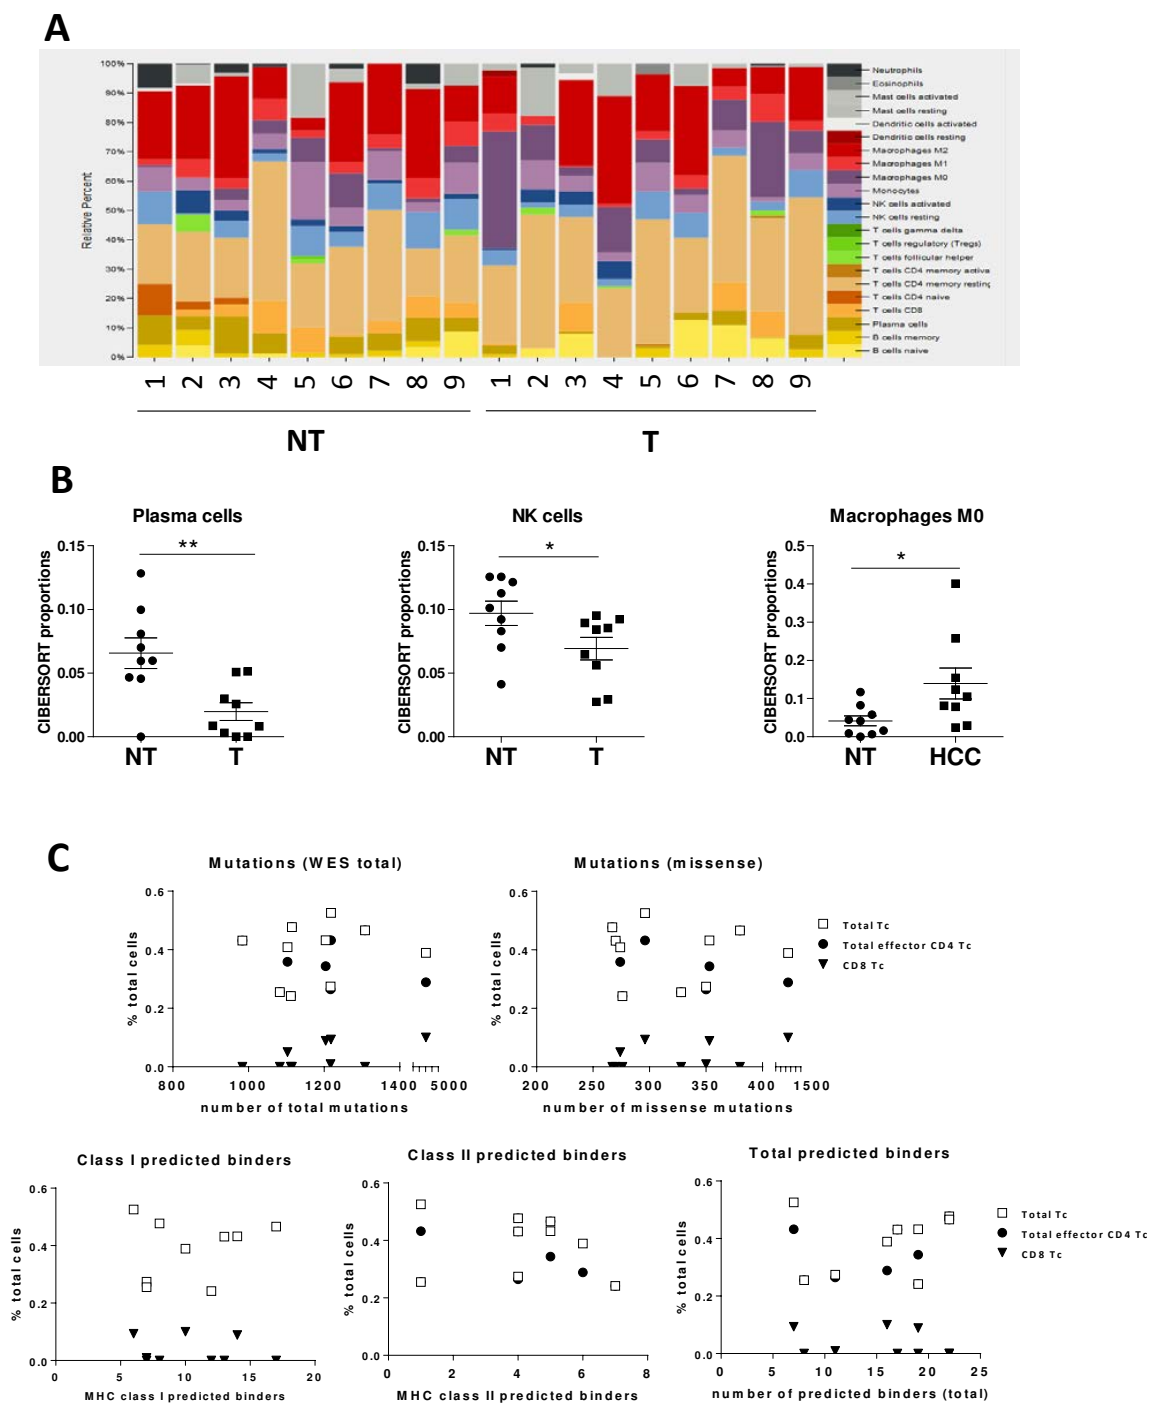

**Supplementary Figure S1. Immune infiltration in HCC tumors.** (A) Data from RNAseq from 9 patients were analyzed using CIBERSORT and the proportion of leukocyte subsets in T and NT samples calculated. (B) Comparison of Plasma cells, NK cells and M0 macrophages in T and NT samples. (C) Association between mutations (total and missense) and predicted neoAg and infiltrating T cells (total, effector CD4 and CD8). (\*)  $p < 0.05$ .

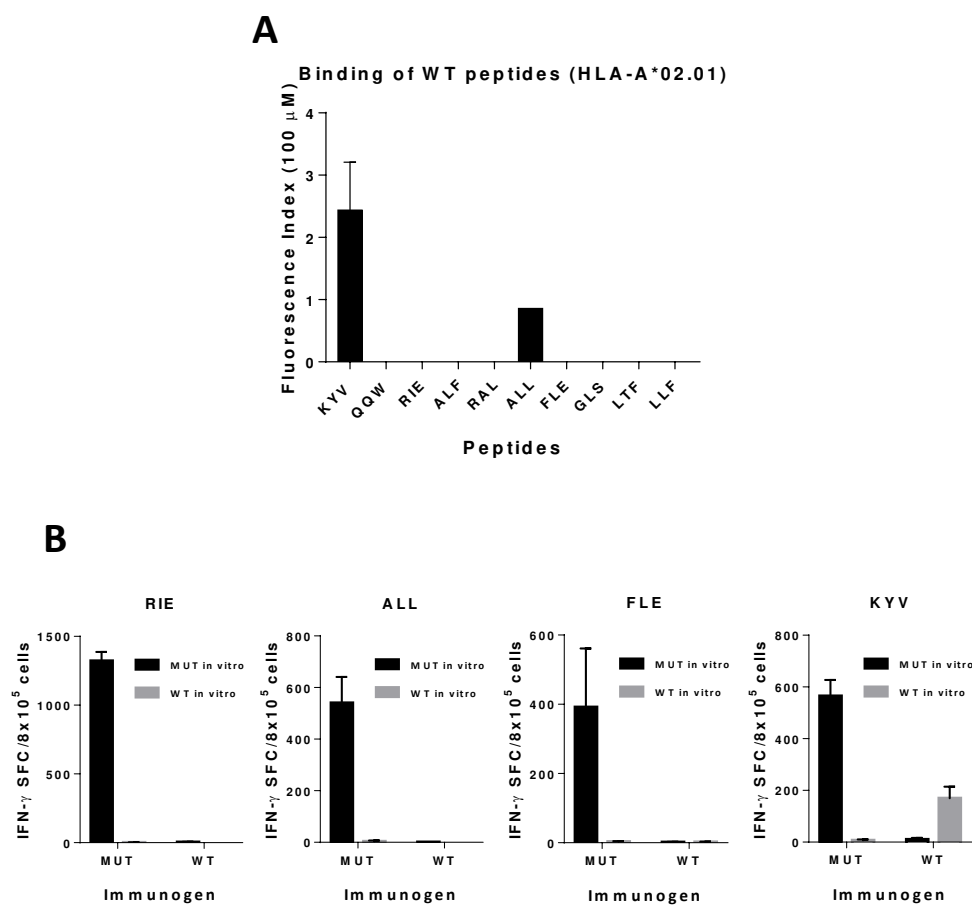

**Supplementary Figure S2. Binding to HLA-A\*02.01 molecules and immunogenicity of the WT versions of predicted neoAgs.** (A) Binding of WT versions (at 100  $\mu$ M) of mutated neoAgs was tested using T2 cells. Result are expressed as Fluorescence Index (FI) and peptides with FI > 0.5 were considered positive. (B) HHD-DR1 mice ( $n=4$ /group) were immunized with mutated or WT versions of neoAgs and immune response against both peptides were evaluated by ELISPOT.

A

| Peptide    | WT sequence (hu) | WT sequence (mu)            | Homology | mut sequence (hu)   | mut sequence (mu)            |
|------------|------------------|-----------------------------|----------|---------------------|------------------------------|
| <b>KYV</b> | KYVDDFGVSV       | KYVDD <u>AG</u> VPV         | 80       | KYV <b>Y</b> DFGVSV | KYV <b>Y</b> D <u>AG</u> VPV |
| <b>QLD</b> | QLDIIPASI        | Q <u>AD</u> KTT <u>AS</u> C | 44       | QLDIIPAS <b>V</b>   | Q <u>AD</u> KTTAS <b>V</b>   |
| <b>QQW</b> | QQRALFFV         | QQR <u>LV</u> VFSV          | 66       | Q <b>Q</b> WLALFFV  | Q <b>Q</b> W <u>LV</u> VFSV  |
| <b>CQQ</b> | CQQRALFFV        | CQQR <u>LV</u> VFSV         | 70       | C <b>Q</b> QWLALFFV | C <b>Q</b> QW <u>LV</u> VFSV |
| <b>RIE</b> | RIECIFFSE        | RIECIFFSE                   | 100      | RIECIFF <b>S</b> V  | RIECIFF <b>S</b> V           |
| <b>ALF</b> | ALFALLEIP        | ALFALLEVP                   | 89       | ALFALLE <b>IL</b>   | ALFALLE <b>VL</b>            |
| <b>RAL</b> | RALFALLEIP       | RALFALLEVP                  | 90       | RALFALLE <b>IL</b>  | RALFALLE <b>VL</b>           |
| <b>ALL</b> | ALLFPESEL        | <u>S</u> LLFPESEL           | 90       | ALLF <b>L</b> ESEL  | <u>S</u> LLF <b>L</b> ESEL   |
| <b>FLE</b> | FPESELSIRI       | FPESELSIRI                  | 100      | <b>F</b> LESELSIRI  | <b>F</b> LESELSIRI           |
| <b>GLS</b> | GVSFFILSL        | GVSFFILSL                   | 100      | <b>G</b> LSFFILSL   | <b>G</b> LSFFILSL            |
| <b>LTF</b> | LKFNQCYGV        | LK <u>S</u> NQCYGV          | 89       | <b>L</b> TFNQCYGV   | <b>L</b> TSNQCYGV            |
| <b>LLF</b> | LLFGYSFAK        | LLFGYS <u>L</u> AK          | 89       | LLFGYS <b>F</b> AT  | LLFGYS <b>L</b> AT           |

B

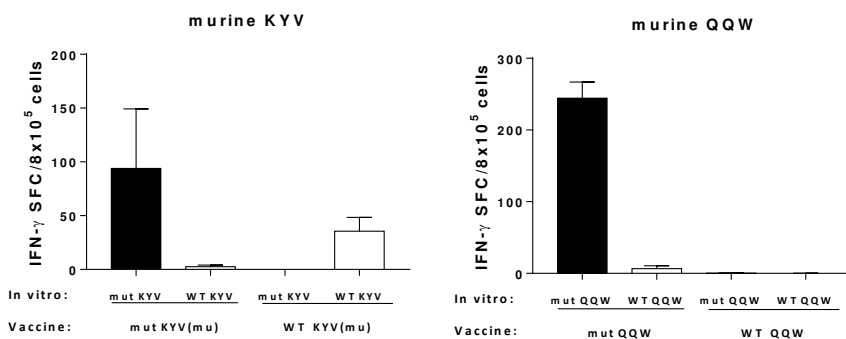

**Supplementary Figure S3. Immunogenicity of mutated and WT peptides bearing murine sequences.** (A) Comparison of the human and murine sequences of mutated and WT peptides indicating the % of homology human/murine. Underlined residues correspond to changes between human and murine peptides. Mutations present in tumor cells are shown in bold. (B) HHD-DR1 mice were immunized with the murine mutated or WT version of peptides KYV and QYW and recognition of mutated and WT versions of murine peptides was evaluated by ELISPOT.

Supplementary Figure S3

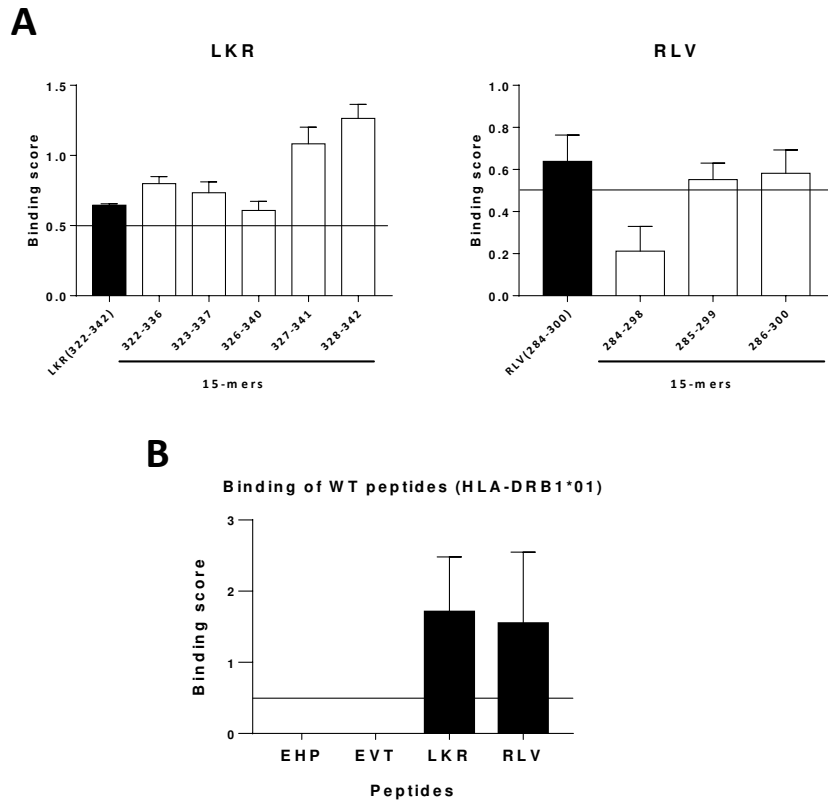

**Supplementary Figure S4. Binding to HLA-DRB1\*01 molecules of neoAg peptides.** Binding to HLA-DRB1\*01 molecules of 15-mer peptides contained in the 21- and 17-mer longer peptides (A) and of the WT version of selected immunogenic neoAgs (B) was evaluated using HOM2 cells. Results are expressed as Binding Score (BS) and peptides with BS > 0.5 were considered positive.

Supplementary Figure S4
